# Supplementary material for: Reactions of molybdenum(vi) with metal ion reductants
Source: Royal Society of Chemistry journal article supplement (doi:10.1039/b516547b), 2006-01-01
Supplement: b516547b.pdf [file b516547b.pdf]

Electronic Supplementary Information for Dalton Transactions  
This journal is © The Royal Society of Chemistry 2006

## **Reactions of molybdenum (VI) with metal ion reductants**

Zhiyong Yang and Edwin S. Gould

### SUPPLEMENTARY MATERIALS

Tables S-1 to S-6. Detailed kinetic data for redox reactions.

Table S-1. The Mo(VI)-Ti(II) reaction; generation of Mo(V) transient. Kinetic data<sup>a</sup>

| [Ti <sup>II</sup> ], mM | [H <sup>+</sup> ], M | 10 <sup>-3</sup> <i>k</i> <sub>obsd</sub> , M <sup>-1</sup> s <sup>-1</sup> <sup>b</sup> |
|-------------------------|----------------------|------------------------------------------------------------------------------------------|
| 1.00                    | 0.50                 | 2.1 (2.0)                                                                                |
| 2.0                     | 0.50                 | 2.1 (2.0)                                                                                |
| 3.0 <sup>c</sup>        | 0.50                 | 2.2 (2.0)                                                                                |
| 5.0 <sup>c</sup>        | 0.50                 | 1.90 (2.0)                                                                               |
| 2.6                     | 0.15                 | 3.7 (3.8)                                                                                |
| 2.6                     | 0.20                 | 3.4 (3.3)                                                                                |
| 2.6                     | 0.25                 | 3.0 (3.0)                                                                                |
| 2.6                     | 0.30                 | 2.7 (2.7)                                                                                |
| 2.6                     | 0.35                 | 2.4 (2.5)                                                                                |
| 2.6                     | 0.40                 | 2.4 (2.3)                                                                                |
| 2.6                     | 0.45                 | 2.2 (2.1)                                                                                |
| 2.6                     | 0.50                 | 1.90 (2.0)                                                                               |
| 2.6                     | 0.50                 | 1.90 <sup>d</sup> (2.0)                                                                  |
| 2.6                     | 0.50                 | 2.0 <sup>e</sup> (2.0)                                                                   |

---

<sup>a</sup>Reactions at 22 °C, μ = 0.50 M (CF<sub>3</sub>SO<sub>3</sub>H/CF<sub>3</sub>SO<sub>3</sub>Na); λ = 430 nm [Mo<sup>VI</sup>] = 0.25 mM

unless otherwise specified. <sup>b</sup>Second order rate constants; parenthetical values were calculated from eq. (8) in text, using parameters in Table 2. <sup>c</sup>[Mo<sup>VI</sup>] = 1.00 mM. <sup>d</sup>[Cl<sup>-</sup>] = 0.050 M. <sup>e</sup>[Cl<sup>-</sup>] = 0.30 M.

Table S-2 – The Mo(VI)-Ti(III) reaction; generation of the Mo(V) transient. Kinetic data<sup>a</sup>

| [Ti(III)], mM | [H <sup>+</sup> ], M | [Cl <sup>-</sup> ], M | $k_{obsd}, s^{-1}$ <sup>b</sup> |
|---------------|----------------------|-----------------------|---------------------------------|
| 2.5           | 0.50                 | 0.50                  | 3.2 (3.4)                       |
| 3.0           | 0.50                 | 0.50                  | 3.9 (3.8)                       |
| 3.8           | 0.50                 | 0.50                  | 4.5 (4.6)                       |
| 5.0           | 0.50                 | 0.50                  | 5.2 (5.3)                       |
| 6.3           | 0.50                 | 0.50                  | 5.9 (6.0)                       |
| 7.3           | 0.50                 | 0.50                  | 6.4 (6.5)                       |
| 3.0           | 0.10                 | 0.50                  | 14.4 (15.3)                     |
| 3.0           | 0.15                 | 0.50                  | 12.1 (11.1)                     |
| 3.0           | 0.20                 | 0.50                  | 9.7 (8.7)                       |
| 3.0           | 0.25                 | 0.50                  | 7.8 (7.2)                       |
| 3.0           | 0.30                 | 0.50                  | 5.1 (6.1)                       |
| 3.0           | 0.40                 | 0.50                  | 4.4 (4.7)                       |
| 3.0           | 0.45                 | 0.50                  | 4.0 (4.2)                       |
| 3.0           | 0.50                 | 0.15                  | 5.1 (4.6)                       |
| 3.0           | 0.50                 | 0.20                  | 5.0 (4.5)                       |
| 3.0           | 0.50                 | 0.25                  | 4.3 (4.4)                       |
| 3.0           | 0.50                 | 0.40                  | 3.8 (4.0)                       |
| 3.0           | 0.50                 | 0.45                  | 3.8 (3.9)                       |
| 3.0           | 0.50                 | 0.50                  | 3.9 (3.8)                       |

<sup>a</sup>Reactions at 22 °C,  $\mu = 0.50$  M (HCl/LiCl); [Mo(VI)] = 0.30 mM throughout.

<sup>b</sup>First order rate constants; parenthetical values were calculated using eq. (9) in text and parameters in Table 2.

Table S-3. The Mo(VI)-V(II) reaction; decay of the Mo(V) transient. Kinetic data<sup>a</sup>

| [V(II)], mM | [H <sup>+</sup> ], M | $k_{obs}$ , s <sup>-1</sup> <sup>b</sup> |
|-------------|----------------------|------------------------------------------|
| 6.0         | 0.50                 | 1.05 (1.32)                              |
| 10.0        | 0.50                 | 1.03 (1.32)                              |
| 20.0        | 0.50                 | 1.06 (1.32)                              |
| 12.0        | 0.15                 | 2.7 (2.9)                                |
| 12.0        | 0.20                 | 2.5 (2.5)                                |
| 12.0        | 0.25                 | 2.3 (2.2)                                |
| 12.0        | 0.30                 | 2.0 (1.9)                                |
| 12.0        | 0.40                 | 1.55 (1.56)                              |
| 12.0        | 0.45                 | 1.37 (1.43)                              |
| 12.0        | 0.50                 | 1.18 (1.32)                              |

<sup>a</sup>Reactions at 22 °C,  $\mu = 0.50$  M (CF<sub>3</sub>SO<sub>3</sub>H/CF<sub>3</sub>SO<sub>3</sub>Na);  $\lambda = 420$  nm. [Mo<sup>VI</sup>] = 0.30 mM.

<sup>b</sup>First order rate constants; parenthetical values were calculated from eq. (10) in text, using parameters in Table 3.

Table S-4 – The Mo(VI)-Ti(II) reaction; decay of the Mo(V) transient. Kinetic data<sup>a</sup>

| [Ti(II)], mM | [H <sup>+</sup> ], M | $k_{obs}$ , s <sup>-1</sup> <sup>b</sup> |
|--------------|----------------------|------------------------------------------|
| 2.0          | 0.50                 | 1.04 (0.97)                              |
| 2.6          | 0.50                 | 1.05 (0.97)                              |
| 3.0          | 0.50                 | 1.11 (0.97) <sup>c</sup>                 |
| 2.6          | 0.15                 | 1.56 (1.57)                              |
| 2.6          | 0.20                 | 1.44 (1.45)                              |
| 2.6          | 0.25                 | 1.36 (1.34)                              |
| 2.6          | 0.30                 | 1.26 (1.24)                              |
| 2.6          | 0.35                 | 1.16 (1.16)                              |
| 2.6          | 0.40                 | 1.07 (1.09)                              |
| 2.6          | 0.45                 | 1.04 (1.03)                              |
| 2.6          | 0.50                 | 0.96 (0.97)                              |
| 2.6          | 0.50                 | 1.05 (0.97) <sup>d</sup>                 |
| 2.6          | 0.50                 | 0.97 (0.97) <sup>d</sup>                 |

<sup>a</sup>Reactions at 22 °C,  $\mu = 0.50$  M (CF<sub>3</sub>SO<sub>3</sub>H/CF<sub>3</sub>Na);  $\lambda = 420$  nm [Mo<sup>VI</sup>] = 0.25 mM unless otherwise indicated. <sup>b</sup>First order rate constants; parenthetical values were calculated from eq. (10) in text, using parameters in Table 3. <sup>c</sup>[Mo(VI)] = 1.0 mM. <sup>d</sup>[Cl<sup>-</sup>] = 0.050 M. <sup>e</sup>[Cl<sup>-</sup>] = 0.40 M.

Table S-5. The Mo(VI)-Eu(II) reaction; decay of the Mo(V) transient. Kinetic data<sup>a</sup>

| [Eu(II)], mM | [H <sup>+</sup> ], M | 10 <sup>2</sup> [Cl <sup>-</sup> ], M | <i>k</i> <sub>obsd</sub> , s <sup>-1</sup> <sup>b</sup> |
|--------------|----------------------|---------------------------------------|---------------------------------------------------------|
| 4.0          | 0.50                 | 50                                    | 12.0 (14.5)                                             |
| 8.0          | 0.50                 | 50                                    | 13.9 (14.5)                                             |
| 12.0         | 0.50                 | 50                                    | 13.7 (14.5)                                             |
| 6.0          | 0.13                 | 55                                    | 30 (30)                                                 |
| 6.0          | 0.20                 | 55                                    | 25 (26)                                                 |
| 6.0          | 0.25                 | 55                                    | 23 (23)                                                 |
| 6.0          | 0.30                 | 55                                    | 20 (21)                                                 |
| 6.0          | 0.40                 | 55                                    | 17.3 (17.8)                                             |
| 6.0          | 0.55                 | 55                                    | 14.7 (15.0)                                             |
| 6.0          | 0.55                 | 0.060                                 | 5.9 (6.2)                                               |
| 6.0          | 0.55                 | 0.25                                  | 6.0 (6.2)                                               |
| 6.0          | 0.55                 | 0.50                                  | 6.4 (6.3)                                               |
| 6.0          | 0.55                 | 1.0                                   | 6.6 (6.4)                                               |
| 6.0          | 0.55                 | 2.5                                   | 7.0 (6.6)                                               |
| 6.0          | 0.55                 | 5.0                                   | 7.8 (7.0)                                               |
| 6.0          | 0.55                 | 20                                    | 9.2 (9.5)                                               |
| 6.0          | 0.55                 | 30                                    | 11.2 (11.1)                                             |

<sup>a</sup>Reactions at 22 °C, μ = 0.55 M (HCl/LiCl); λ = 430 nm. Generation of intermediate was too rapid to allow collection of kinetic data. <sup>b</sup>First order rate constants; parenthetical values were calculated from eq. (11) in text, using parameters in Table 3.

Table S-6 – The Mo(VI)-Ti(III) reaction; decay of the Mo(V) transient. Kinetic data<sup>a</sup>

| [Ti(III)], mM | [H <sup>+</sup> ], M | [Cl <sup>-</sup> ], M | $k_{obsd}, s^{-1}$ <sup>b</sup> |
|---------------|----------------------|-----------------------|---------------------------------|
| 2.5           | 0.50                 | 0.50                  | 3.3 (3.6)                       |
| 3.0           | 0.50                 | 0.50                  | 3.8 (4.0)                       |
| 3.8           | 0.50                 | 0.50                  | 4.4 (4.6)                       |
| 5.0           | 0.50                 | 0.50                  | 5.1 (5.3)                       |
| 6.3           | 0.50                 | 0.50                  | 6.0 (5.9)                       |
| 7.5           | 0.50                 | 0.50                  | 6.4 (6.4)                       |
| 3.0           | 0.10                 | 0.50                  | 0.74 (0.80)                     |
| 3.0           | 0.15                 | 0.50                  | 1.15 (1.20)                     |
| 3.0           | 0.20                 | 0.50                  | 1.47 (1.61)                     |
| 3.0           | 0.25                 | 0.50                  | 2.0 (2.0)                       |
| 3.0           | 0.40                 | 0.50                  | 3.5 (3.2)                       |
| 3.0           | 0.45                 | 0.50                  | 3.9 (3.6)                       |
| 3.0           | 0.50                 | 0.15                  | 1.32 (1.21)                     |
| 3.0           | 0.50                 | 0.20                  | 1.78 (1.61)                     |
| 3.0           | 0.50                 | 0.25                  | 2.4 (2.0)                       |
| 3.0           | 0.50                 | 0.40                  | 3.6 (3.2)                       |
| 3.0           | 0.50                 | 0.45                  | 3.8 (3.6)                       |
| 3.0           | 0.50                 | 0.50                  | 3.9 (4.0)                       |

---

<sup>a</sup>Reactions at 22 °C;  $\mu = 0.50$  M (HCl/LiCl);  $\lambda = 430$  nm. <sup>b</sup>First order rate constants; parenthetical values were calculated from eq. (12) in text, using parameters in Table
